# Supplementary material for: Effective enhancement of the mechanical properties of macroscopic single-walled carbon nanotube fibers by pressure treatment
Source: Royal Society of Chemistry journal article supplement (doi:10.1039/c6ra21238g), 2016-01-01
Supplement: c6ra21238g1.pdf [file c6ra21238g1.pdf]

## Electronic Supplementary Information

### Effective enhancement of the mechanical properties of macroscopic single-walled carbon nanotube fibers by pressure treatment

Gu Hou<sup>ab</sup>, Gang Wang<sup>ab</sup>, Ya Deng<sup>ab</sup>, Jian Zhang<sup>ab</sup>, Jean Pierre Nshimiyimana<sup>ab</sup>,  
Xiannian Chi<sup>ab</sup>, Xiao Hu<sup>ab</sup>, Weiguo Chu<sup>\*a</sup>, Hongwei Dong<sup>\*a</sup>, Zhong Zhang<sup>a</sup>, Luqi Liu<sup>a</sup>,  
Lianfeng Sun<sup>\*a</sup>

<sup>a</sup>CAS Key Laboratory of Nanosystem and Hierarchical Fabrication, Nanofabrication  
laboratory, CAS Center for Excellence in Nanoscience, National Center for  
Nanoscience and Technology, Beijing 100190, China

<sup>b</sup>University of Chinese Academy of Sciences, Beijing 100049, China.

## 1. Calculation of pressure value on ribbon-like fiber

The oil pressure in the laboratory press we used can be obtained through gauge kit, which is represented as  $p$ . The cross sectional area of oil cylinder is marked as  $S$ .

Then the weight  $M$  that put on the sample can be obtained by following equation:

$$M = p \times S \quad (1)$$

Specifically, the diameter of oil cylinder in laboratory press we used is 87.8 mm.

Then, after measuring the length and width of ribbon-like fiber, we can obtain contact area ( $S_0$ ) during the pressure treatment. The pressure value ( $p_0$ ) that was applied on fibers can be calculated as following:

$$p_0 = M / S_0 \quad (2)$$

## 2. Tensile testing results of cylindrical fibers and ribbon-like fibers

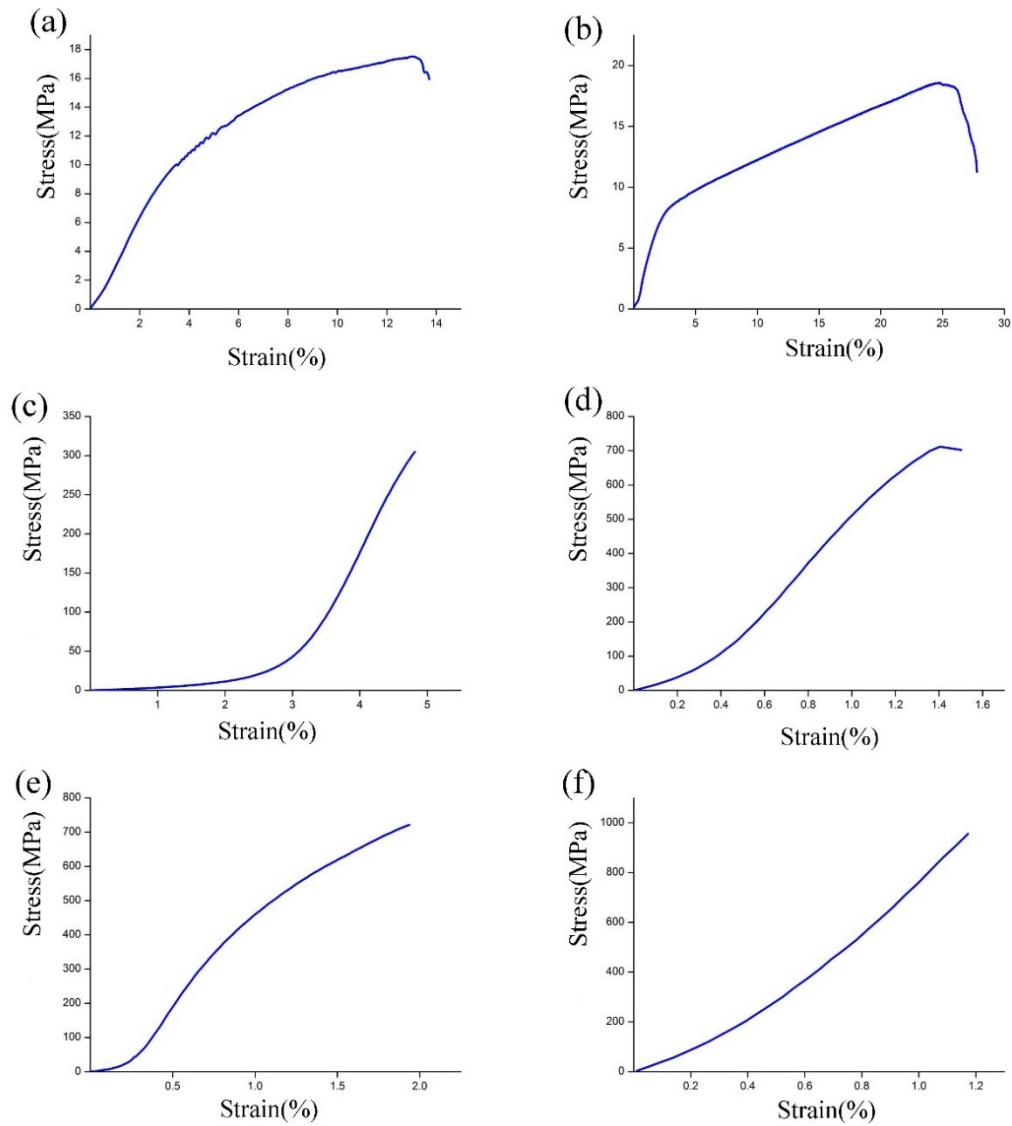

**Fig. S1.** Stress versus strain curves of cylindrical fibers and ribbon-like fibers, which respond to (a) Cylindrical fiber 1, (b) Cylindrical fiber 2, (c) Ribbon-like fiber 1, (d) Ribbon-like fiber 2, (e) Ribbon-like fiber 3 and (f) Ribbon-like fiber 4 in table I , respectively.

3. SEM morphology of fracture surface of ribbon-like fibers after mechanical testing.

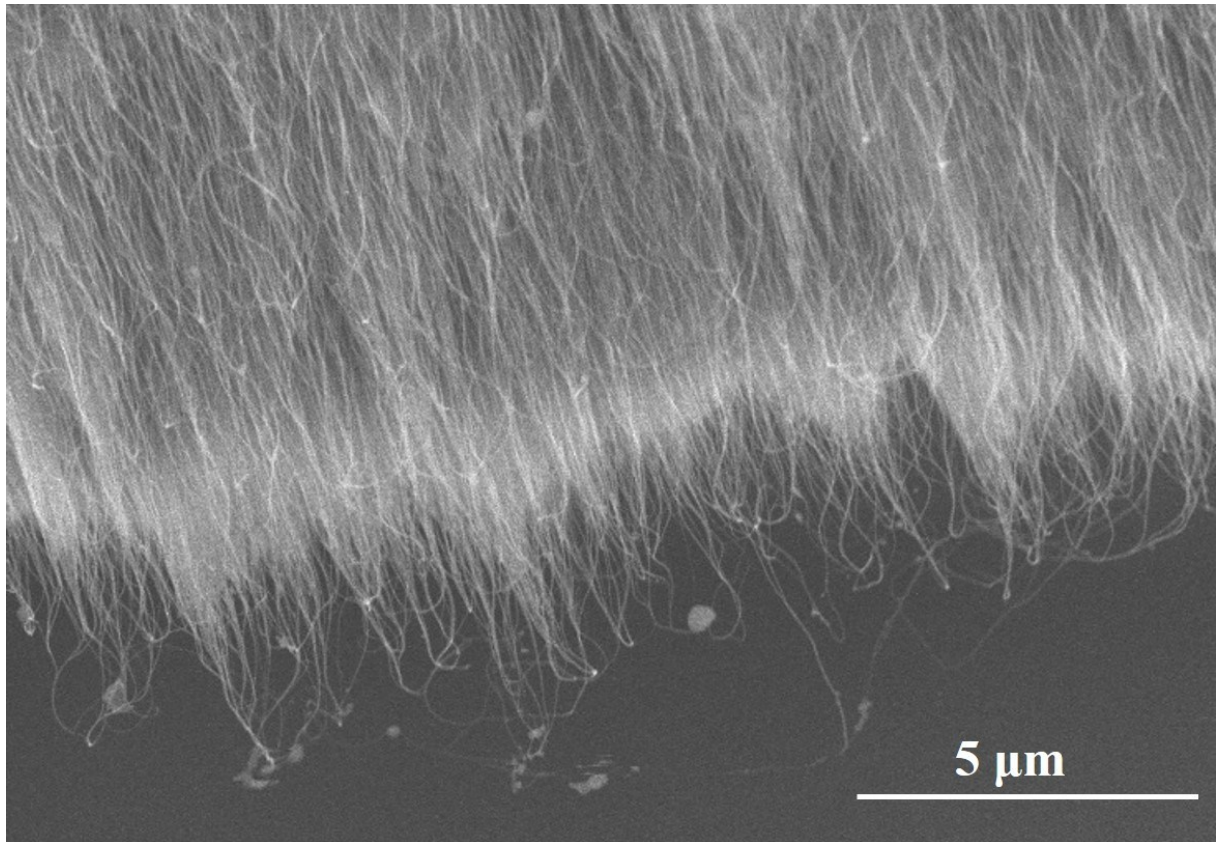

**Fig. S2.** SEM morphology of fracture surface of ribbon-like fibers after mechanical testing, which indicated that the failure mechanism of the fiber is pulling out of SWNTs.

4. Typical High-resolution transmission electron microscopy image of SWNT ribbon-like fiber.

The ribbon-like fibers (compressed with pressure of 3.7 GPa) were dispersed in ethanol. The dispersions were sonicated for 10 minutes and a drop of the dispersions were dripped on the copper grid. Fig. S3 is a typical HRTEM image. It can be clearly seen that most of the SWNTs are in bundles and a few isolated individual SWNTs remain as the white arrows indicate. This result indicates that after the pressure treatment, the SWNTs are not transformed into other carbon materials.

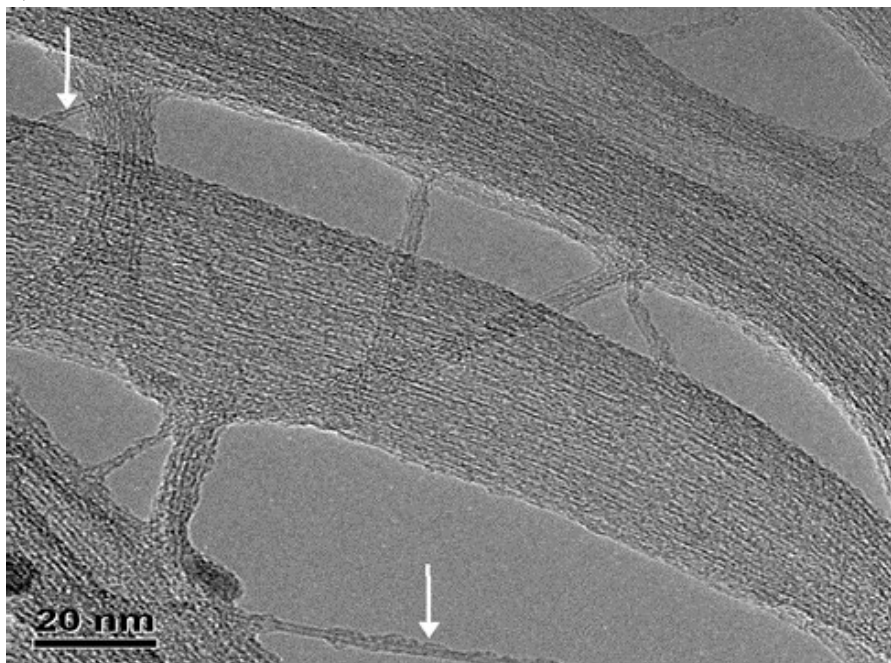

**Fig. S3.** Typical high-resolution transmission electron microscopy image of SWNT ribbon-like fiber, which is treated with pressure of 3.7 GPa.
